# Supplementary material for: Reverse genetics demonstrate the role of mucosal C-type lectins in food particle selection in the oyster Crassostrea virginica
Source: Oxford University Press journal article supplement (doi:10.1242/jeb.174094), 2018-01-01
Supplement: jeb174094supp.pdf [file jeb174094supp.pdf]

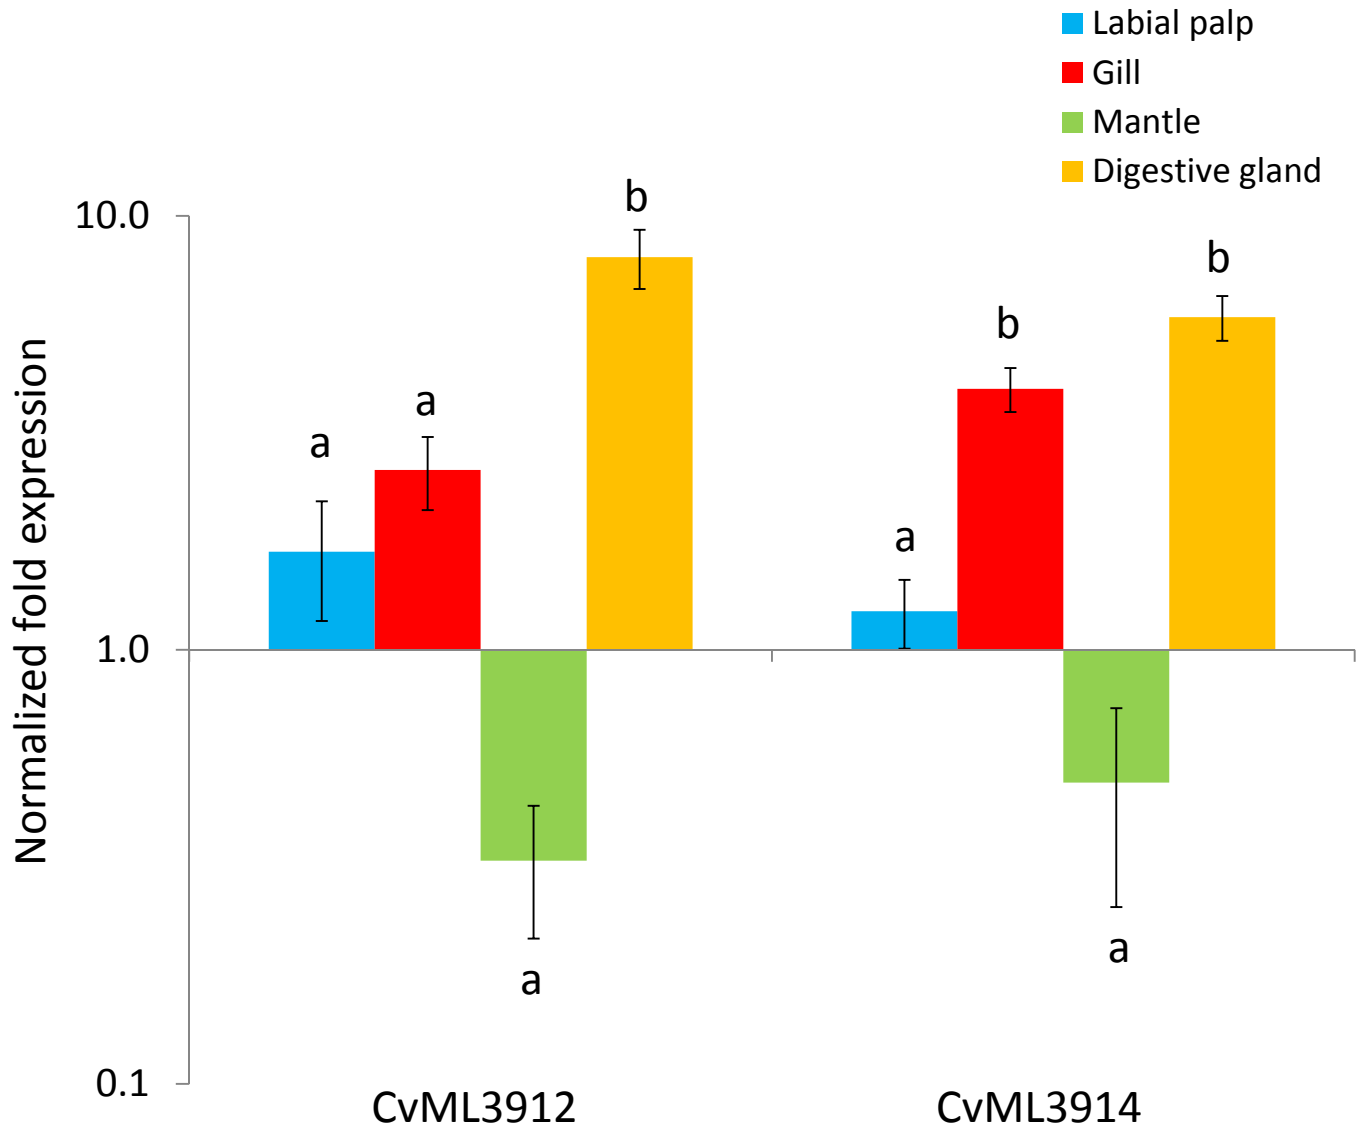

Figure S1. Relative expression of CvML3912 and CvML3914 in oyster tissues determined by quantitative real-time PCR. Expression levels were normalized to 18S RNA and are presented as relative expression (mean  $\pm$  SEM, n=8 oysters). Different letters indicate significant differences between tissues (ANOVA, SNK,  $p < 0.05$ ).

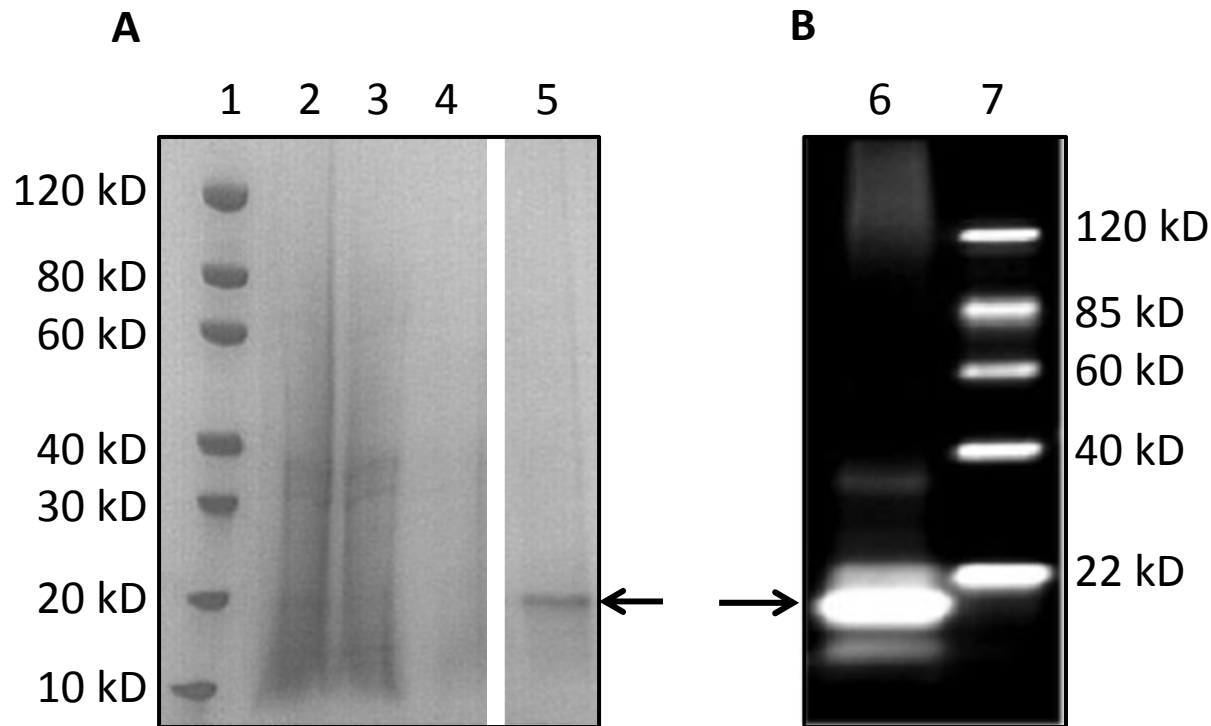

Figure S2. SDS-page (A) and Western Blot (B) analysis of the recombinant CvML3912 protein (rCvML3912). The SDS-PAGE was run on 4%~20% gradient gel, followed by Coomassie Blue staining. Lane 1: Protein marker (M00516, GenScript), Lane 2: Load, Lane 3: Flow through, Lane 4: Final wash, Lane 5: Elution with urea buffer and 300 mM imidazole, Lane 6: Western blot using anti-His antibody (A00186, GenScript), Lane 7: Protein marker (MM0908, GenScript). Arrows indicate rCvML3912.

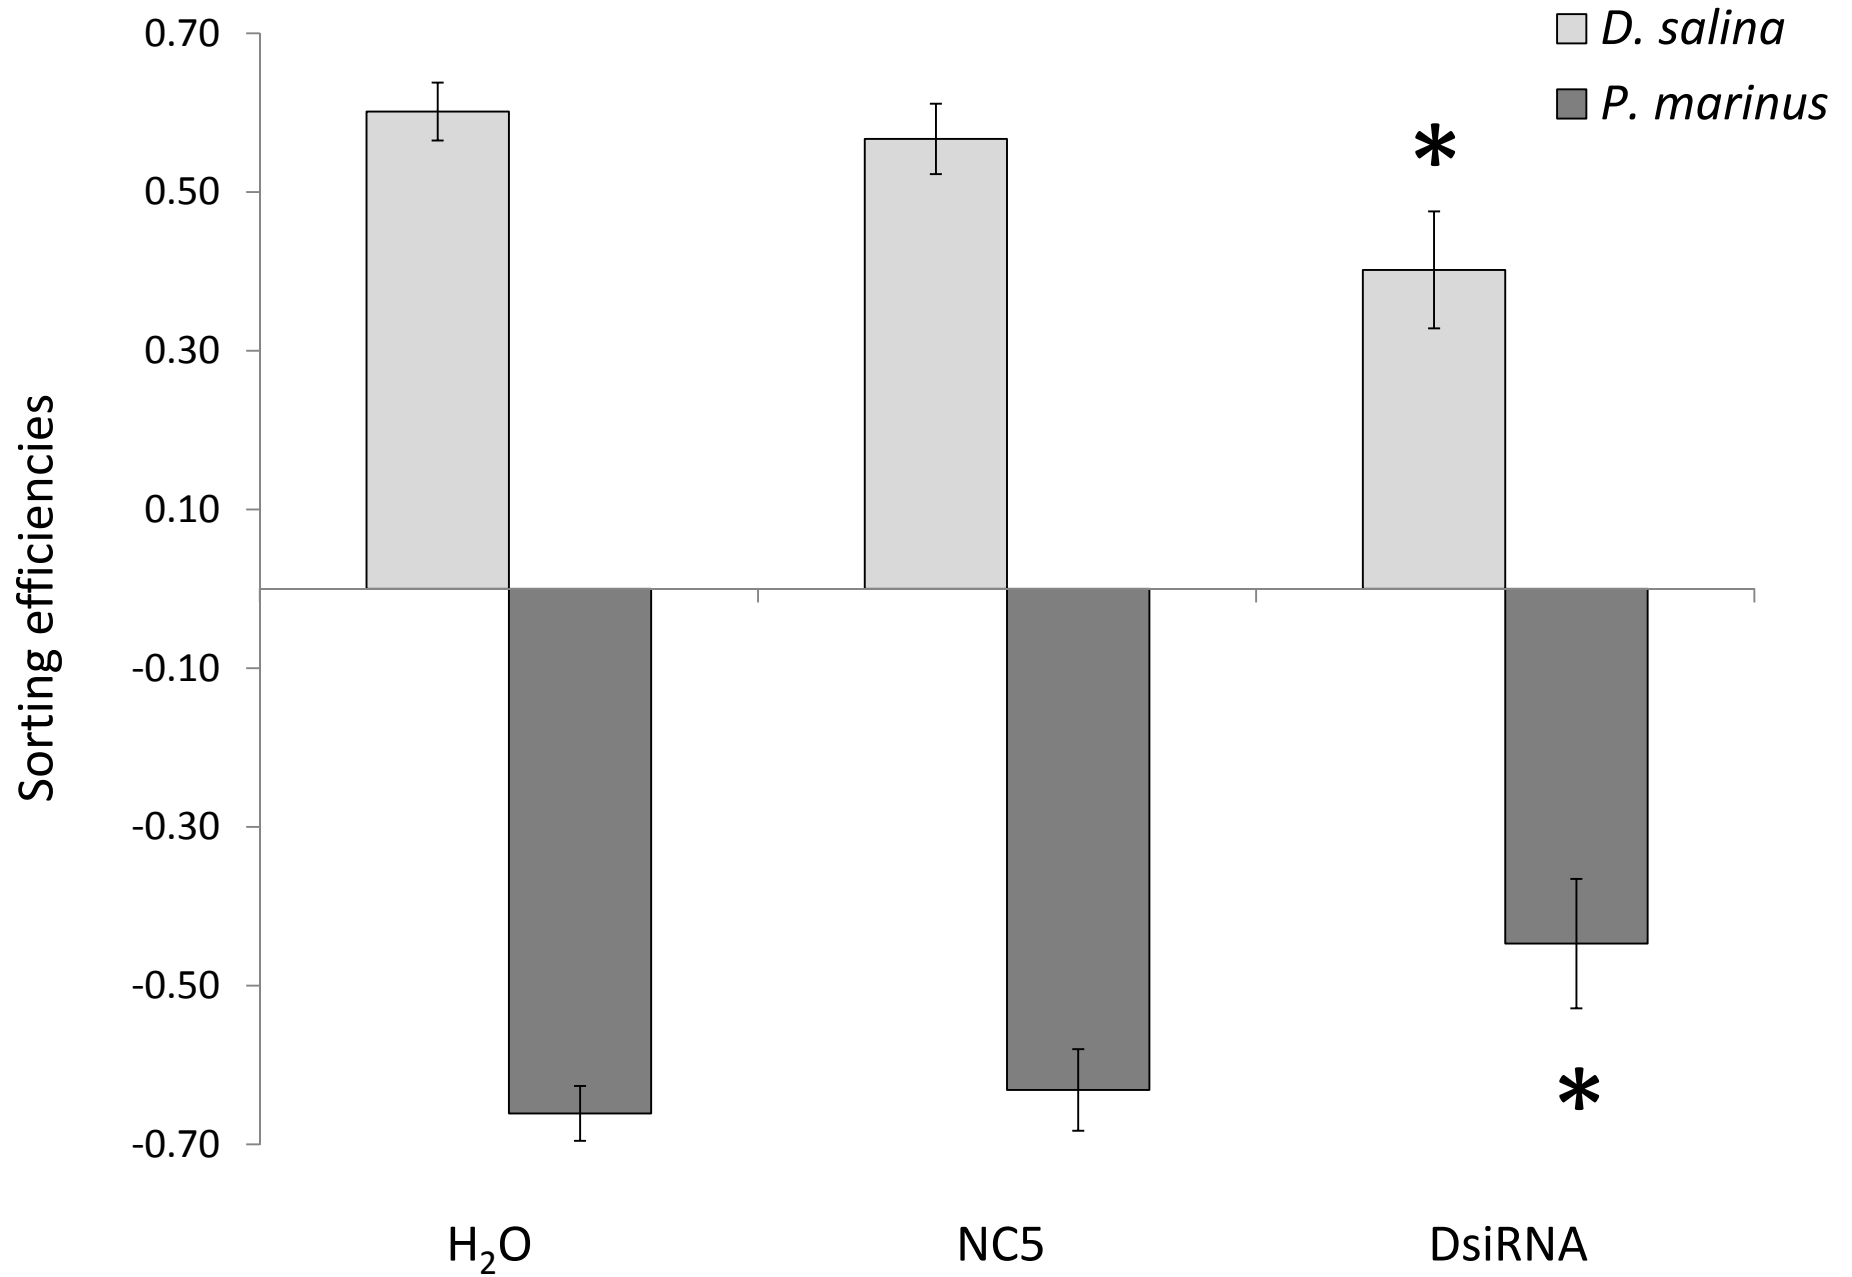

Figure S3.

Pales Espinosa and Allam

Figure S3. Sorting efficiencies (SE, mean  $\pm$  SEM) of *C. virginica* injected (34 days post-injection, experiment 2) with either seawater (H2O), NC5 or DsiRNAs and fed a diet made with equal proportions of the *D. salina* and *P. marinus*. SE are significantly different from 0 for all treatments (one sample *t*-test,  $n = 12$ ,  $p < 0.001$ ). Asterisks indicate a significant change in SE (G-test,  $n = 12$ ,  $p < 0.001$ ) among silenced oysters (DsiRNAs) as compared to oysters from the two other treatments. No difference was observed between the two controls (H2O and NC5).

Table S1. LC-MS/MS detection of specific peptides from the two proteins CvML3912 and CvML3914. Position (starting and ending) of each peptide on the corresponding protein sequences, number of spectral count and Log(e) values (subscript) are indicated.

| PEPTIDES                     | Position | c102634_g1_i1_3912   |                      | c102634_g1_i2_3914    |                       |
|------------------------------|----------|----------------------|----------------------|-----------------------|-----------------------|
|                              |          | Assay1               | Assay2               | Assay1                | Assay2                |
| MKTQIIILLAVLTAVLATCPADWQSYGD | 1-28     |                      | 1 <sub>(-1.9)</sub>  |                       |                       |
| TCPADWQSYGDK                 | 18-29    | 2 <sub>(-5.7)</sub>  | 2 <sub>(-4.1)</sub>  |                       |                       |
| TCPADWNHYR                   | 18-27    |                      |                      | 7 <sub>(-3.5)</sub>   |                       |
| DKCFFLSR                     | 28-35    |                      |                      | 2 <sub>(-2.8)</sub>   |                       |
| LCEVIGSQYGR                  | 46-66    |                      |                      | 2 <sub>(-6.9)</sub>   | 4 <sub>(-6.3)</sub>   |
| LCEMIGSQYR                   | 46-65    | 6 <sub>(-5.6)</sub>  | 14 <sub>(-6.6)</sub> |                       |                       |
| RVASLATIDDAGTQK              | 66-70    | 3 <sub>(-4.7)</sub>  |                      |                       |                       |
| VASLATIDDAGTQNHIANLIK        | 67-77    |                      |                      | 21 <sub>(-14.7)</sub> | 14 <sub>(-11.3)</sub> |
| VASLATIDDAGTQK               | 67-70    | 2 <sub>(-13.2)</sub> | 2 <sub>(-11.0)</sub> |                       |                       |
| TIDDAGTQNHIANLIK             | 62-70    |                      |                      | 2 <sub>(-5.0)</sub>   | 2 <sub>(-6.5)</sub>   |
| VFTYTNWGPQQPNR               | 105-119  | 7 <sub>(-5.5)</sub>  | 4 <sub>(-8.5)</sub>  |                       |                       |
| DGAENCAVLNLYLPDEGFDMK        | 120-139  |                      |                      | 4 <sub>(-13.3)</sub>  | 6 <sub>(-4.2)</sub>   |
| GGDENCAVLR                   | 120-129  | 2 <sub>(-3.8)</sub>  | 3 <sub>(-2.7)</sub>  |                       |                       |

Table S2. FITC lectins used to characterize microalgae cell surface carbohydrates. Origin and carbohydrate specificity (provided by the manufacturer EY Labs) of each lectin are given.

| <b>Name</b> | <b>Origin</b>               | <b>Carbohydrate specificity</b>                                                |
|-------------|-----------------------------|--------------------------------------------------------------------------------|
| <b>ConA</b> | <i>Canavalia ensiformis</i> | $\alpha$ -D-Mannose, $\alpha$ -D-Glucose, branched mannose                     |
| <b>PEA</b>  | <i>Pisum sativum</i>        | Methyl-D-Mannopyranoside, D-Mannose                                            |
| <b>PNA</b>  | <i>Arachis hypogaea</i>     | Terminal $\beta$ -Galactose                                                    |
| <b>PWM</b>  | <i>Phytolacca americana</i> | Oligomers of $\beta$ (1,4)-linked N-Acetylglucosamine                          |
| <b>SBA</b>  | <i>Glycine maxima</i>       | $\alpha$ and $\beta$ - N-Acetylgalactosamine, $\alpha$ and $\beta$ - Galactose |
| <b>UEA</b>  | <i>Ulex europaeus</i>       | $\alpha$ -L-Fucose                                                             |
| <b>WGA</b>  | <i>Triticum vulgaris</i>    | Chitobiose, N-Acetyl-glucosamine                                               |

Table S3. Primers and DsiRNA used in this study. NC5 represents the negative control DsiRNA and was used in both experiments.

| Name                   | Sequence (5'-3')                                       | Exp1 | Exp2 |
|------------------------|--------------------------------------------------------|------|------|
| <i>qRT-PCR primers</i> |                                                        |      |      |
| 18S-F                  | CGCCGGCGACGTATCTTTCAA                                  |      |      |
| 18S-R                  | CTGATTCCCCGTTACCCGTTA                                  |      |      |
| CvML3912-F             | GTTCTGGCAAATTTTATGCGAA                                 |      |      |
| CvML3912-R             | AATGAAAGCCGCAGAATCGG                                   |      |      |
| CvML3914-F             | CCACATAGCAAACCTCATTAAAC                                |      |      |
| CvML3914-R             | AATCTGAAGCACATGGGTC                                    |      |      |
| Name                   | Sequence (5'-3')                                       | Exp1 | Exp2 |
| <i>DsiRNA</i>          |                                                        |      |      |
| DsiRNA-1_Sense         | rCrArGrCrArGrArUrCrArArGrUrArUrUrCrCrArCrArUrGCA       | ✓    |      |
| DsiRNA-1_AntiSense     | rUrGrCrArUrGrUrGrGrArArUrArCrUrUrGrArUrCrUrGrCrUrGrArG | ✓    |      |
| DsiRNA-2_Sense         | rCrUrGrArCrArGrCrArGrUrUrCrUrUrGrCrArArCrArUrGCC       |      | ✓    |
| DsiRNA-2_AntiSense     | rGrGrCrArUrGrUrUrGrCrArArGrArArCrUrGrCrUrGrUrCrArGrGrA |      | ✓    |
| DsiRNA-3_Sense         | rGrUrGrArGrArUrGrArUrUrGrGrUrUrCrArCrArArUrArCCG       | ✓    | ✓    |
| DsiRNA-3_AntiSense     | rCrGrGrUrArUrUrGrUrGrArArCrCrArArUrCrArUrCrUrCrArCrArG | ✓    | ✓    |
| DsiRNA-4_Sense         | rCrCrArUrGrUrGrCrUrUrCrArGrArUrUrCrArArUrUrATA         |      | ✓    |
| DsiRNA-4_AntiSense     | rUrArUrArArUrUrGrArArArUrCrUrGrArArGrCrArCrArUrGrGrUr  |      | ✓    |
| DsiRNA-5_Sense         | rGrCrCrArCrCrGrArCrArUrCrGrUrCrCrArUrGrArArGrATA       |      | ✓    |
| DsiRNA-5_AntiSense     | rUrArUrCrUrUrCrArUrGrGrArCrGrArUrGrUrCrGrGrUrGrGrCrUrC |      | ✓    |
| DsiRNA-6_Sense         | rGrUrGrCrCrGrUrGrCrUrUrArArUrUrArCrUrUrArCrCrAGA       |      | ✓    |
| DsiRNA-6_AntiSense     | rUrCrUrGrGrUrArArGrUrArArUrUrArArGrCrArCrGrGrCrArCrArG |      | ✓    |
| NC5_Sense              | rCrArUrArUrUrGrCrGrCrGrUrArUrArGrUrCrGrCrGrUrUrArG     | C    | C    |
| NC5_AntiSense          | rUrGrGrUrArUrArArCrGrCrGrCrArUrArUrCrArGrCrGrCrArArUrC | C    | C    |
